# Supplementary material for: Ionic covalent organic framework for selective detection and adsorption of TcO4−/ReO4−
Source: Royal Society of Chemistry journal article supplement (doi:10.1039/d3cc02429f), 2023-01-01
Supplement: d3cc02429f1.pdf [file d3cc02429f1.pdf]

**Electronic Supplementary Information (ESI)**

**Ionic covalent organic framework for selective  
detection and adsorption of  $\text{TcO}_4^-/\text{ReO}_4^-$**

Xiao-Rong Chen<sup>a</sup>, Cheng-Rong Zhang<sup>a</sup>, Xin Liu<sup>a</sup>, Ru-Ping Liang<sup>a,\*</sup> and Jian-Ding Qiu<sup>a,b,\*</sup>

<sup>a</sup>College of Chemistry, Nanchang University, Nanchang 330031, China

<sup>b</sup>State Key Laboratory of Nuclear Resources and Environment, East China University of Technology, Nanchang 330013, China

\*Corresponding authors. Tel/Fax: +86-791-83969518. E-mail: rpliang@ncu.edu.cn; jdqiu@ncu.edu.cn.

## EXPERIMENT SECTION

### Materials.

The Re ICP standard solution (1000 mg/L in 2% nitric acid) was purchased from Henan Wanjia R&D Center Co., Ltd. 4,4',4'',4'''-([9,9'-bicarbazole]-3,3',6,6'-tetrayl)tetraaniline (BTTA) and 1,1-bis(2,4-dinitrophenyl)-4,4-bipyridinium dichloride (BDNP) were purchased from Jilin Chinese Academy of Sciences-Yanshen Technology Co., Ltd. Sodium Perrhenate (NaReO<sub>4</sub>) was purchased from Energy Chemical Technology (Shanghai) Co., Ltd. Ethanol (EtOH), tetrahydrofuran (THF), N,N-dimethylformamide (DMF) and other nitrate salts were purchased from Sinopharm Chemical Reagent Co., Ltd. Ultrapure water was prepared from the Millipore system (18.25 MΩ cm). All reagents were used without further purification, and all the experiments were conducted at room temperature.

### Instruments.

Fourier-transform infrared (FT-IR) spectra were recorded with a Bruker TENSOR 27 instrument. Powder X-ray diffraction (PXRD) data of the nanomaterials were collected on a Bruker AXS D8 Advance A25 Powder X-ray diffractometer (40 kV, 40 mA) using Cu K $\alpha$  ( $\lambda=1.5406$  Å) radiation. The fluorescence (FL) spectra were recorded on a FL spectrophotometer (F-7000, Hitachi). Time-resolved spectra were recorded with a FLS1000 instrument. X-ray photoelectron spectroscopy (XPS) spectra were performed on a Thermo VG Multilab 2000X with Al K $\alpha$  irradiation. The radiation stability of BTTA-BDNP was investigated in a GAMMATOR M-38-2 (USA) irradiator with a <sup>60</sup>Co source ( $\gamma$ -ray). Solid-state NMR experiments were performed on a Bruker WB Advance II 600 MHz NMR spectrometer. The <sup>13</sup>C CP/MAS NMR spectra were recorded with a 4-mm double-resonance MAS probe and with a sample spinning rate of 10.0 kHz; a contact time of 2 ms (ramp 100) and a pulse delay of 3 s were applied. The nitrogen adsorption and desorption isotherms were measured at 77 K using a Micromeritics ASAP 2020M system. The samples were outgassed at 120 °C for 8 h before the measurements. Surface areas were calculated from the adsorption data using Brunauer-Emmett-Teller (BET) methods. The pore-size-distribution curves were obtained via the non-local density functional

theory (NLDFIT) method. The thermal properties of the nanomaterials were evaluated using a STA PT1600 Linseis thermogravimetric analysis (TGA) instrument over the temperature range of 30 to 800 °C under nitrogen atmosphere with a heating rate of 10 °C/min. Metal ions concentrations were determined using an iCAP Q inductively coupled plasma mass spectrometry (ICP-MS, Thermo Fisher Scientific, USA).

### **Synthesis of BTTA-BDNP COF.**

BTTA-BDNP was synthesized via the Zincke reaction of 4,4',4'',4'''-([9,9'-bicarbazole]-3,3',6,6'-tetrayl)tetraaniline (BTTA) and 1,1-bis(2,4-dinitrophenyl)-4,4'-bipyridinium dichloride (BDNP). A mixture of BTTA (25.78 mg, 37 μmol) and BDNP (41.54 mg, 74 μmol) were added to the microwave reaction vessel. Then, 12 mL of ethanol (EtOH) and 3 mL of ultra-pure water were added to the microwave reaction vessel. The mixture was sonicated for 10 min, reacted at 90 °C under microwave irradiation for 2 h. The solid produced in the reaction was collected by centrifugation. The obtained solid was washed several times with ethanol and ultra-pure water, dried in a vacuum oven at 60 °C for 12 h to obtain a reddish-brown powder.

### **Detection Experiment.**

The BTTA-BDNP solution (0.25 mg/mL) was prepared by dissolving the BTTA-BDNP in deionized DMF. The ionic reserve fluids (1 mM) were prepared by dissolving the corresponding sodium salts or nitrate salts of  $\text{ReO}_4^-$ ,  $\text{Na}^+$ ,  $\text{Cl}^-$ ,  $\text{Br}^-$ ,  $\text{Co}^{2+}$ ,  $\text{ClO}_4^-$ ,  $\text{SO}_4^{2-}$ ,  $\text{PO}_4^{3-}$ ,  $\text{I}^-$ ,  $\text{NO}_3^-$ ,  $\text{CO}_3^{2-}$ ,  $\text{F}^-$ ,  $\text{K}^+$ ,  $\text{Ca}^{2+}$ , and  $\text{Fe}^{3+}$  in ultrapure water. For  $\text{ReO}_4^-$  sensing, the various concentrations of  $\text{ReO}_4^-$  (20 μL) were added to the BTTA-BDNP suspension (40 μL), then DMF (440 μL) was added to the solution to dilute the volume to 500 μL. To further investigate the effect of other interfering ions on  $\text{ReO}_4^-$  detection, the solution of interfering ions or mixed ion (20 μL, 400 μM) were added to BTTA-BDNP COF suspension. The fluorescence spectra were measured from 420 to

650 nm employing the excitation of 400 nm. Detection limit =  $3\sigma / K$ ,  $\sigma$  is the standard deviation of the fluorescence intensity of the blank solution and  $K$  corresponds to slope of linear equation.

### **Recyclability.**

Regenerate BTTA-BDNP by treating with equal volume of NaCl (3 M) solution and shaking for 24 hours. The resulting suspension was filtered and washed with ultrapure water several times. After vacuum drying, the resulting material was used in another detection experiment.

### **Sorption experiment**

**Optimization of adsorption pH.** 5 mg adsorbent was added to 10 mL 28 ppm  $\text{ReO}_4^-$  aqueous solution with varying pH from 2 to 12. The solution pH was adjusted by adding NaOH and  $\text{HNO}_3$ . The mixture was shaken at 200 rpm for 24 hours, and separated with a 0.22  $\mu\text{m}$  nylon membrane filter to obtain a clear liquid for ICP analysis.

**Sorption isotherm study.** The adsorption isotherms study of BTTA-BDNP was conducted by adding 10 mg of adsorbent into 20 mL aqueous solutions of varying the initial concentrations of  $\text{ReO}_4^-$  (ca. 25-1000  $\text{mg L}^{-1}$ ), then stirred overnight to achieve equilibrium. The suspension was separated with a 0.22  $\mu\text{m}$  nylon membrane filter for ICP-MS analysis. The adsorption capacity was calculated based on equation (1).

$$q_e = \frac{(C_0 - C_e)V}{m} \quad (1)$$

where  $q_e$  ( $\text{mg g}^{-1}$ ) is the equilibrium adsorption capacity,  $C_0$  ( $\text{mg L}^{-1}$ ) and  $C_e$  ( $\text{mg L}^{-1}$ ) is the initial concentration and equilibrium concentration of  $\text{ReO}_4^-$ , respectively.  $m$  (mg) is the mass of the adsorbent and  $V$  (L) is the volume of the solution.

The Langmuir isotherm is based on the assumption that the adsorbent can only be adsorbed in a single layer on the adsorbent. The linear fitting of the Langmuir isotherm model is expressed by equation (2).

$$\frac{C_e}{q_e} = \frac{1}{q_m k_L} + \frac{C_e}{q_m} \quad (2)$$

where  $q_m$  ( $\text{mg g}^{-1}$ ) is the maximum sorption capacity,  $k_L$  is a constant indirectly related to sorption capacity and energy of sorption ( $\text{L mg}^{-1}$ ), which characterizes the affinity of the adsorbate with the adsorbent.

The Freundlich model is an empirical equation based on sorption on a heterogeneous surface. The linear fitting of the Freundlich isotherm model is expressed by equation (3).

$$\ln q_e = \ln k_F + \frac{1}{n} \ln C_e \quad (3)$$

where  $k_F$  and  $n$  are the Freundlich constants related to the sorption capacity and the sorption intensity, respectively.

**Sorption kinetics study.** The sorption kinetics experiments were carried out under the conditions of pH 7 and solid-liquid ratio  $0.5 \text{ g L}^{-1}$ . 10 mg of BTTA-BDNP was added into 20 mL aqueous solutions of the initial concentrations of  $\text{ReO}_4^-$  ( $28 \text{ mg}\cdot\text{L}^{-1}$ ). Under magnetic stirring, the resulting mixture was stirred for a desired contact time (1 min, 3 min, 6 min, 20 min, 40 min and 60 min), then take 1 mL samples and using 0.22  $\mu\text{m}$  nylon membrane filter for ICP-MS detection. The removal rate (RE) was calculated based on equation (4). The distribution coefficient ( $K_d$ ) of BTTA-BDNP toward  $\text{ReO}_4^-$  was calculated based on equation (5).

$$\text{RE} = \frac{(C_0 - C_t)}{C_0} \times 100\% \quad (4)$$

$$K_d = \frac{V(C_0 - C_e)}{mC_e} \quad (5)$$

where  $C_t$  is the concentration of  $\text{ReO}_4^-$  at time  $t$ .

**Removal rate in simulated wastes.** According to reported research, we prepared the simulated Hanford LAW Melter Recycle solution. The experiment was conducted as follows. 5 mg, 25 mg adsorbent was added to 5 mL of the above simulated solution, respectively. The mixture was shaken at 150 rpm for 24 hours, and separated with a 0.22  $\mu\text{m}$  nylon membrane filter to obtain a clear liquid for ICP analysis.

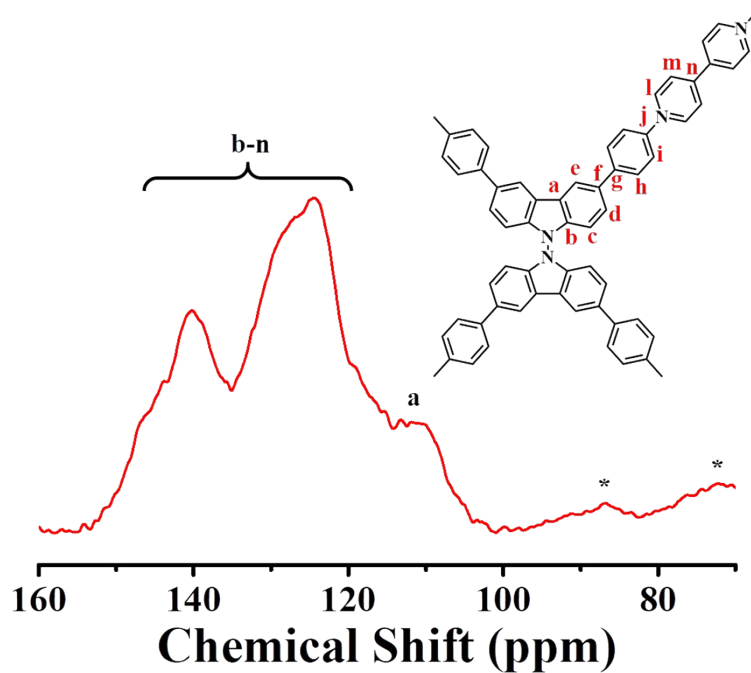

**Fig. S1.** Solid-state  $^{13}\text{C}$  CP/MAS NMR spectrum of BTTA-BDNP.

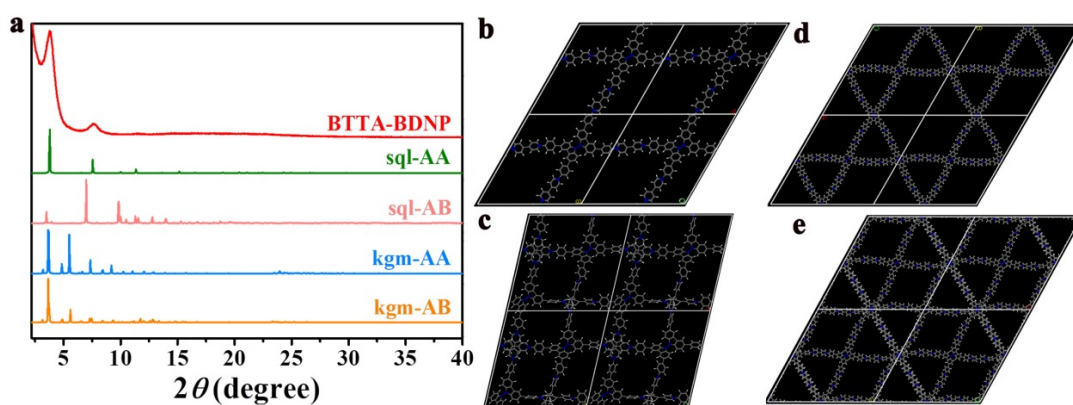

**Fig. S2.** (a) Experimental PXR patterns of BTTA-BDNP (red), simulated profiles for monoclinic sql-AA model (green), sql-AB model (pink), kgm-AA model (blue) and kgm-AB model (orange). (b) sql-AA model and (c) sql-AB model crystal lattice packing of BTTA-BDNP. (d) kgm-AA model and (e) kgm-AB model crystal lattice packing of BTTA-BDNP.

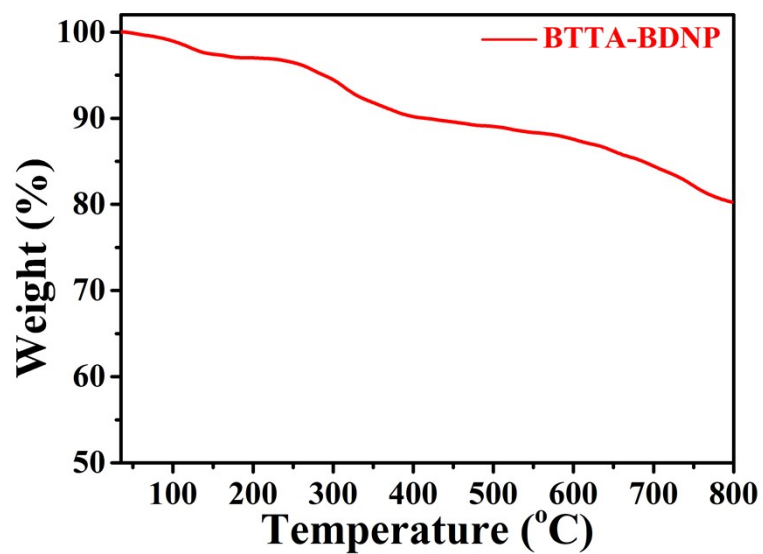

**Fig. S3.** TGA curve of BTTA-BDNP under  $N_2$  atmosphere.

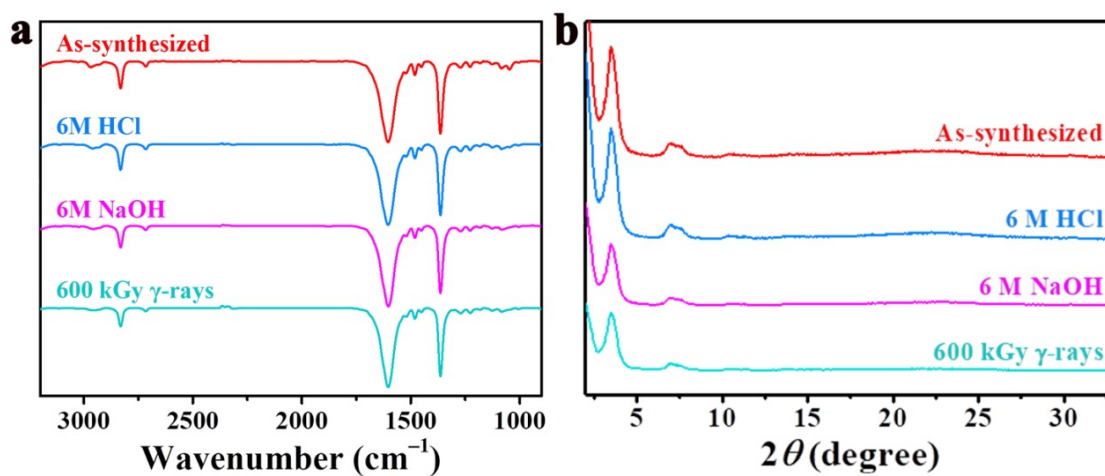

**Fig. S4.** (a) FT-IR spectra and (b) PXRD patterns of BTTA-BDNP before and after treatment with 600 kGy  $\gamma$ -ray irradiation, 6 M NaOH, and 6 M HCl for 12 h.

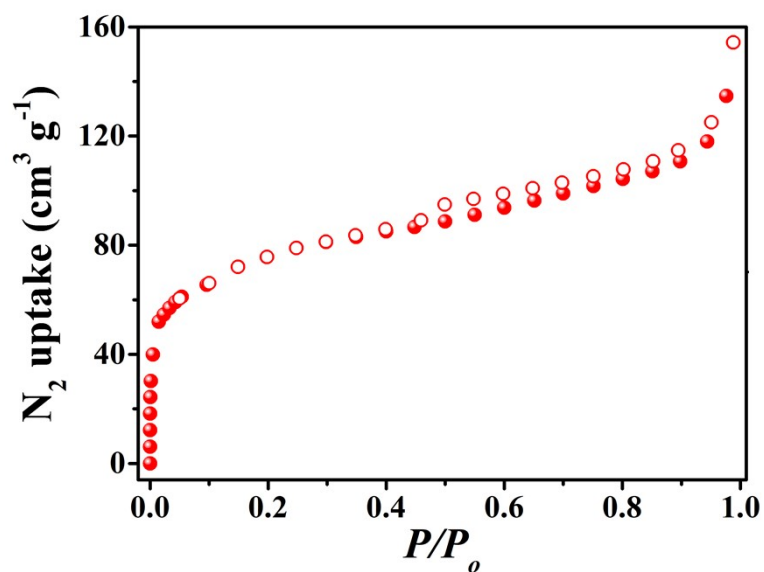

**Fig. S5.** Nitrogen-sorption isotherm curves measured at 77 K for BTTA-BDNP.

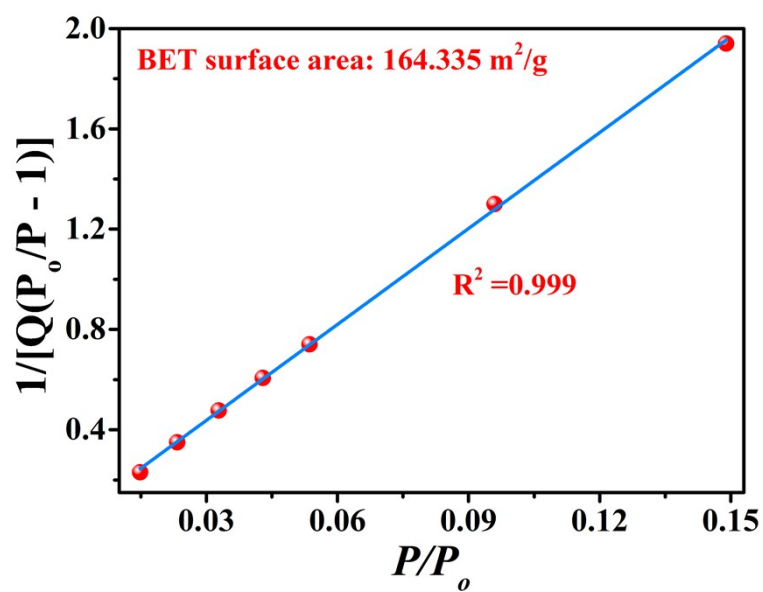

**Fig. S6.** BET surface area plots of BTTA-BDNP.



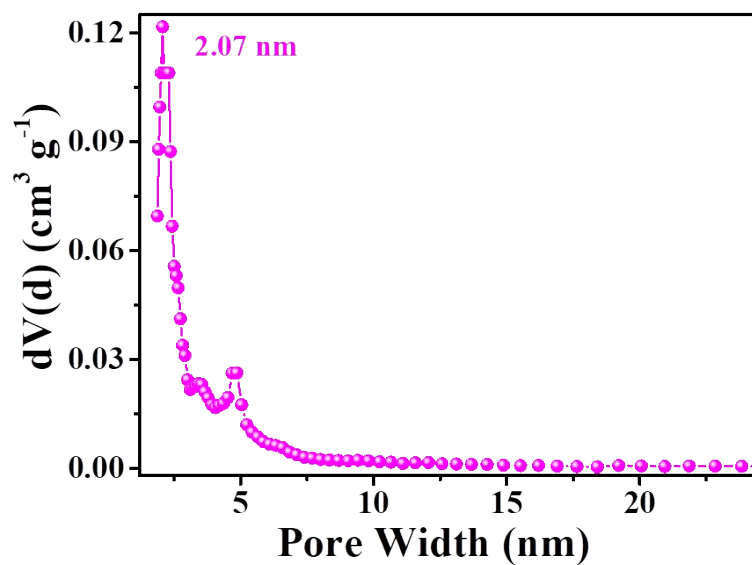

**Fig. S7.** Pore-size distribution profiles of BTTA-BDNP.

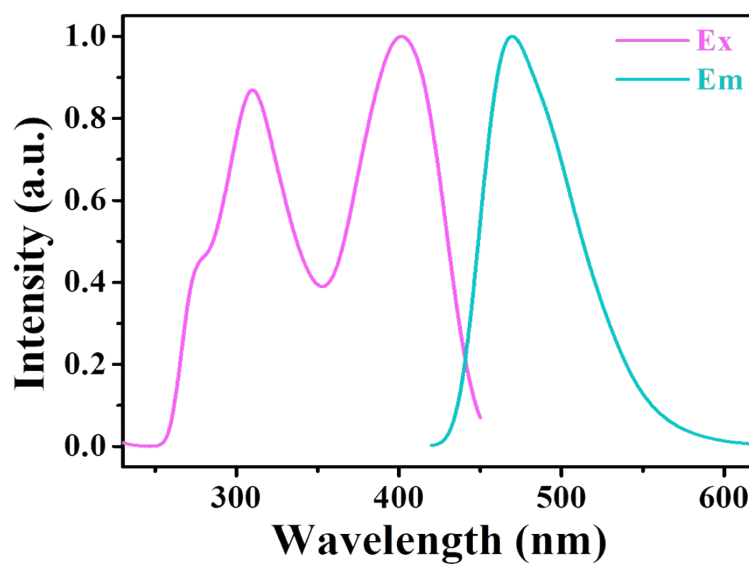

**Fig. S8.** Normalized fluorescence excitation and emission spectra of BTTA-BDNP dispersed in DMF.

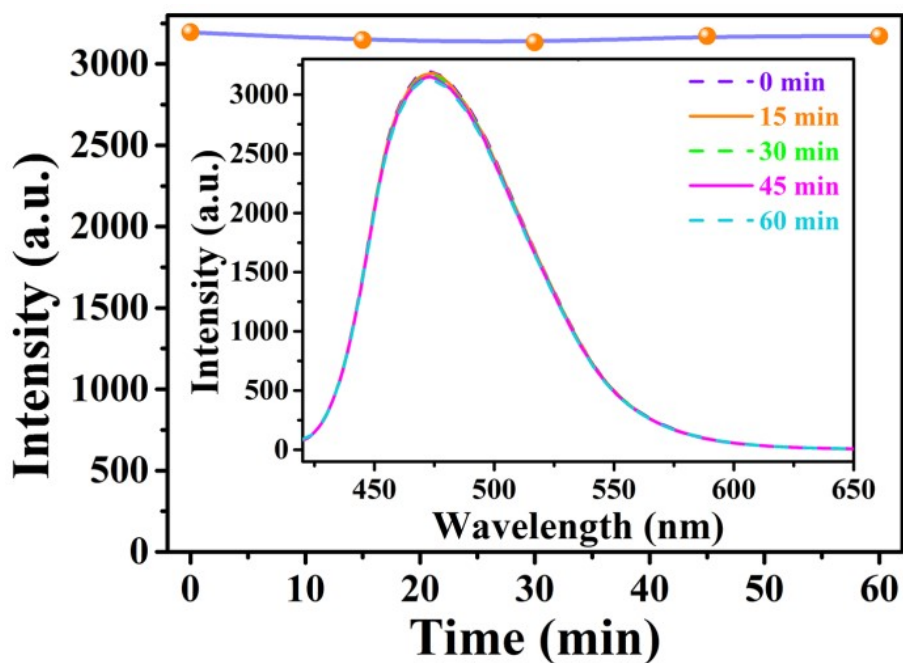

**Fig. S9.** Time-dependent fluorescence intensity of BTТА-BDNP (dispersed in DMF) tested within 60 minutes.

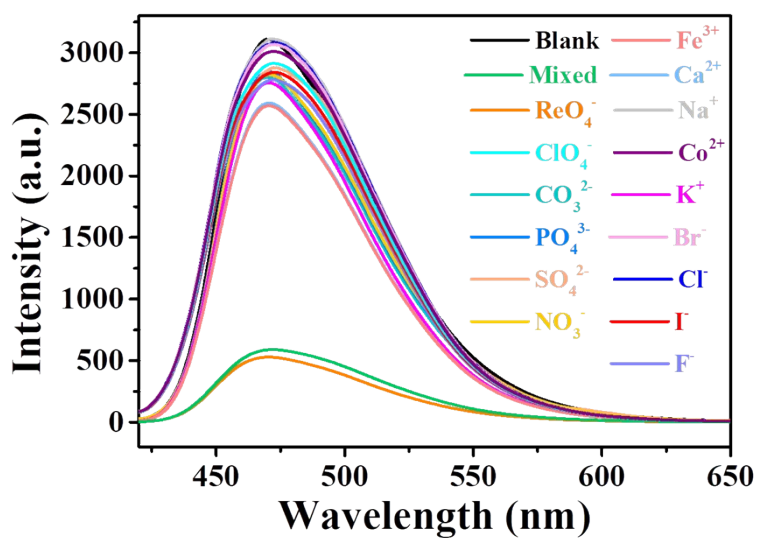

**Fig. S10.** Fluorescence intensity of the BTТА-BDNP COF at 470 nm in the presence of 500  $\mu\text{M}$  of interfering ions or 100  $\mu\text{M}$  of  $\text{ReO}_4^-$ .

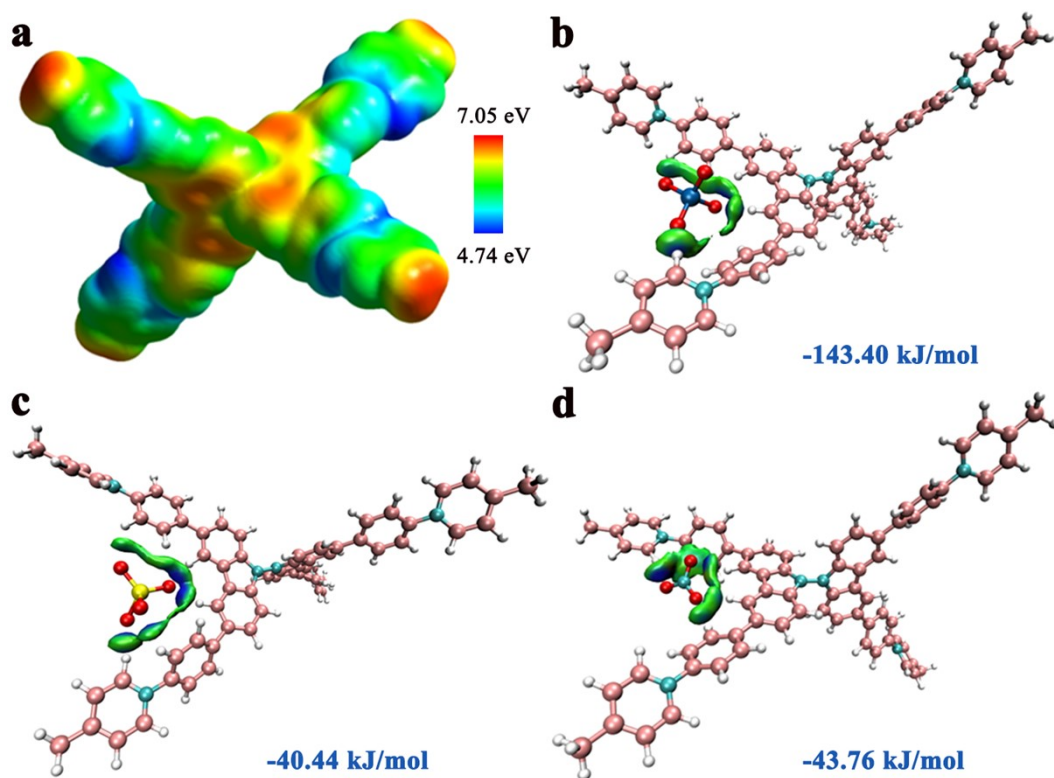

**Fig. S11.** (a) ESP map of the BTTA-BDNP fragment. (b) IGM analysis and binding energies of (b) BTTA-BDNP- $\text{ReO}_4^-$ , (c) BTTA-BDNP- $\text{SO}_4^{2-}$  and (d) BTTA-BDNP- $\text{NO}_3^-$ .

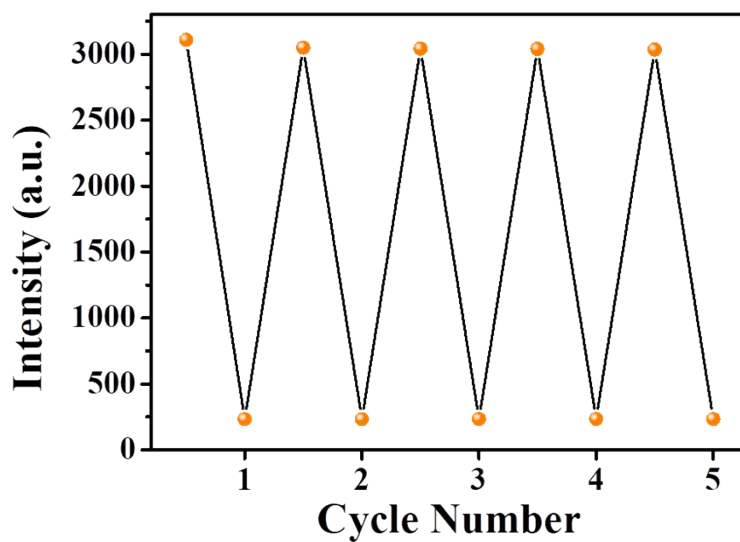

**Fig. S12.** Recycle use of BTTA-BDNP for selective detection of  $\text{ReO}_4^-$ .

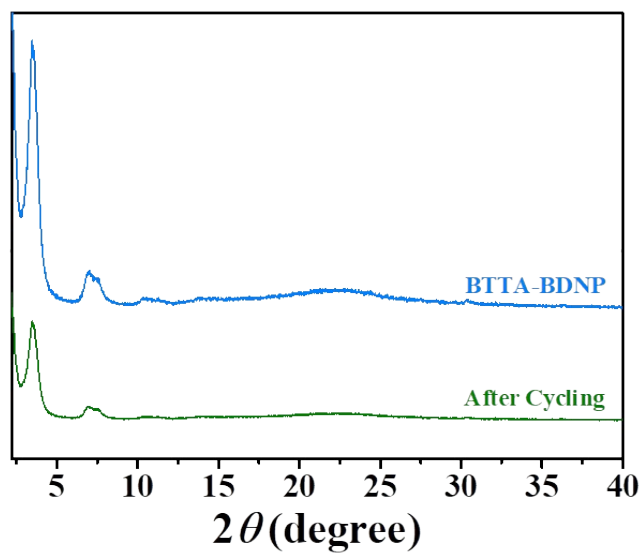

**Fig. S13.** The PXRD patterns of BTTA-BDNP before and after recycling test.

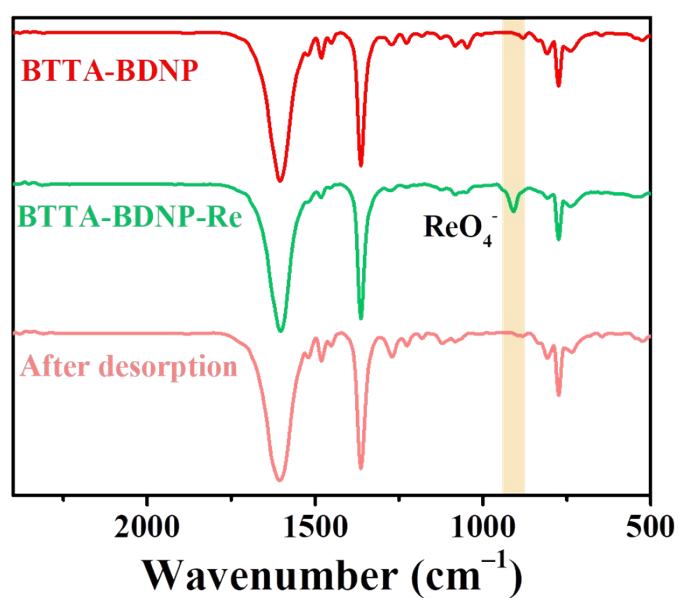

**Fig. S14.** FT-IR spectra of BTTA-BDNP before and after adsorption as well as after desorption.

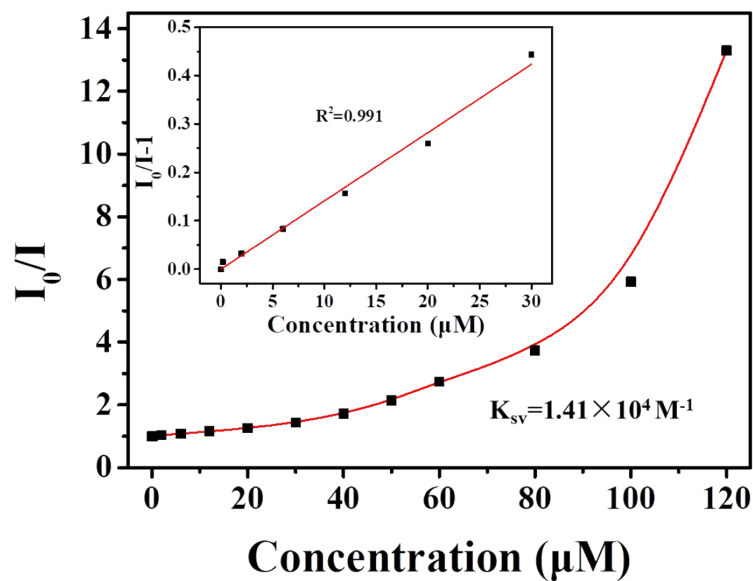

**Fig. S15.** Stern-Volmer plot of BTTA-BDNP for detecting  $\text{ReO}_4^-$ . Inset: Determination of  $K_{sv}$  value for BTTA-BDNP for detecting  $\text{ReO}_4^-$ .

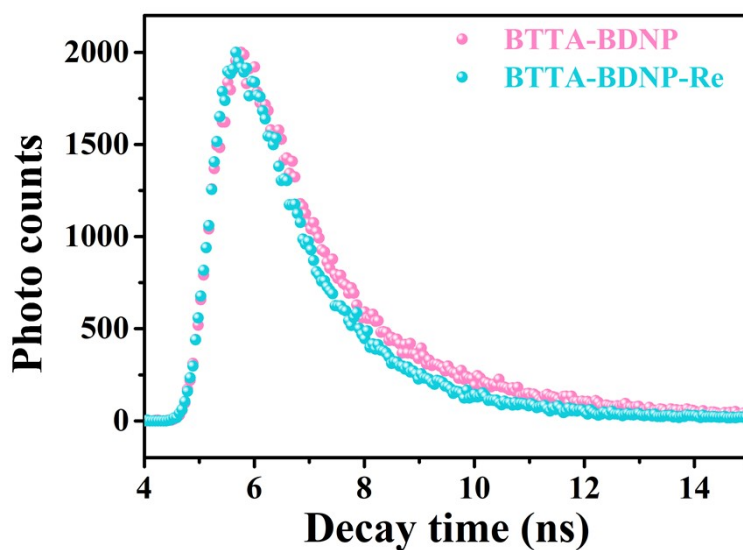

**Fig. S16.** Fluorescence decay profiles of BTTA-BDNP obtained by treatment without and with  $\text{ReO}_4^-$ .

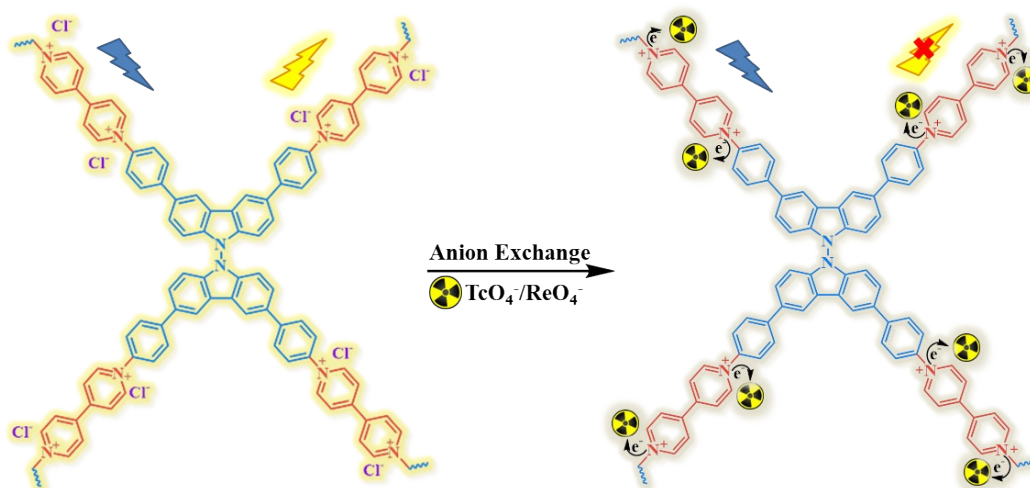

**Fig. 17.** Fluorescence enhancement mechanism.

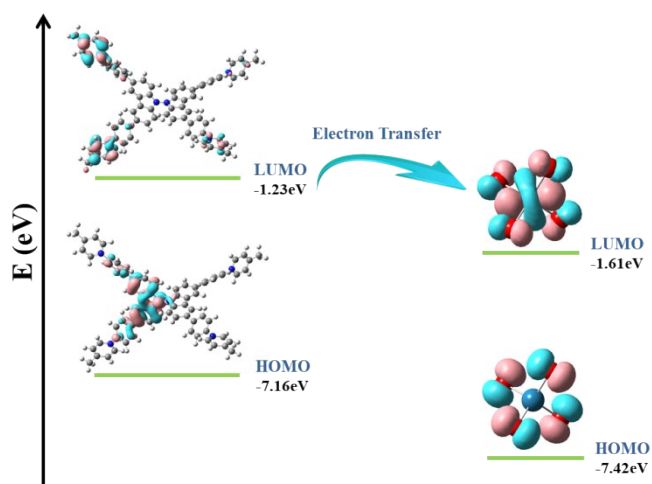

**Fig. S18.** Highest occupied molecular orbital (HOMO) and lowest unoccupied molecular orbital (LUMO) energy levels of BTDA-BDNP, and  $\text{ReO}_4^-$  computed by DFT.

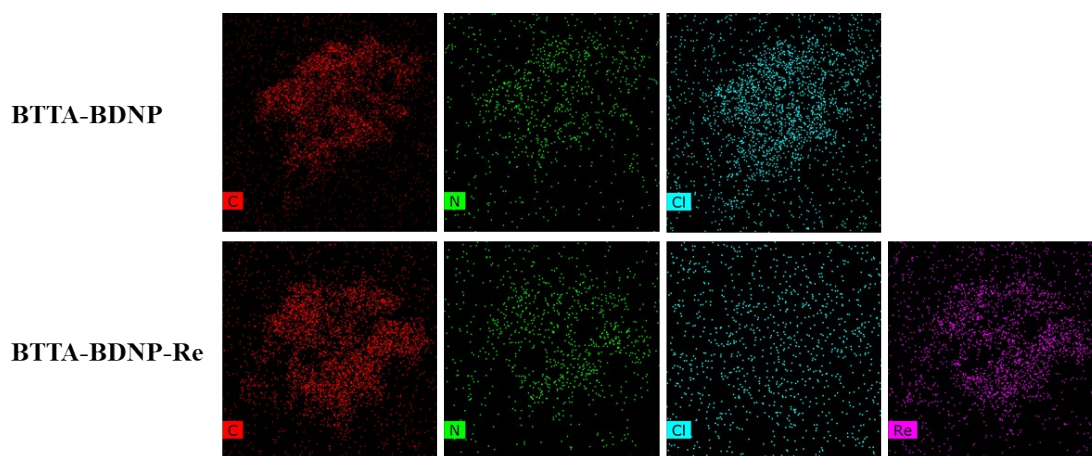

**Fig. S19.** SEM-EDS maps of BTTA-BDNP and BTTA-BDNP-Re.

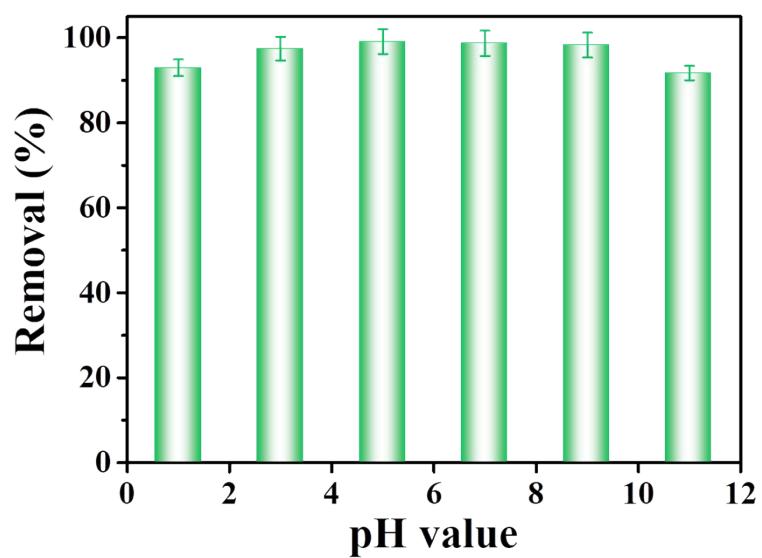

**Fig. S20.** Influence of pH for  $\text{ReO}_4^-$  capture employing BTTA-BDNP.

**Table S1.** Fractional atomic coordinates for the sql-AA stacking unit cell of BTTA-BDNP.

| <p style="text-align: center;"><i>Space group: P 1 (1) - triclinic</i><br/> <math>a=27.1347 \text{ \AA}, b = 27.2678 \text{ \AA}, c = 4.1703 \text{ \AA}</math><br/> <math>\alpha = \beta = 90^\circ, \gamma = 120^\circ</math></p> |          |          |          |      |          |          |          |
|-------------------------------------------------------------------------------------------------------------------------------------------------------------------------------------------------------------------------------------|----------|----------|----------|------|----------|----------|----------|
| Atom                                                                                                                                                                                                                                | <i>x</i> | <i>y</i> | <i>z</i> | Atom | <i>x</i> | <i>y</i> | <i>z</i> |
| C1                                                                                                                                                                                                                                  | 0.6428   | 0.30412  | 0.70932  | C42  | 0.42034  | 0.34303  | -0.26594 |
| C2                                                                                                                                                                                                                                  | 0.60073  | 0.27621  | 0.90265  | N43  | 0.28463  | 0.34635  | -0.39181 |
| C3                                                                                                                                                                                                                                  | 0.5971   | 0.2278   | 1.0267   | C44  | 0.25575  | 0.30585  | -0.58361 |
| C4                                                                                                                                                                                                                                  | 0.63526  | 0.20817  | 0.95613  | C45  | 0.20959  | 0.30378  | -0.71995 |
| C5                                                                                                                                                                                                                                  | 0.67798  | 0.23804  | 0.76142  | C46  | 0.19116  | 0.34271  | -0.65692 |
| C6                                                                                                                                                                                                                                  | 0.68056  | 0.28579  | 0.64232  | C47  | 0.22096  | 0.38347  | -0.45669 |
| C7                                                                                                                                                                                                                                  | 0.63053  | 0.15664  | 1.08482  | C48  | 0.26776  | 0.38504  | -0.32935 |
| C8                                                                                                                                                                                                                                  | 0.63367  | 0.11498  | 0.92971  | C49  | 0.7038   | 0.36643  | 0.40288  |
| C9                                                                                                                                                                                                                                  | 0.62981  | 0.06656  | 1.05016  | C50  | 0.73289  | 0.41128  | 0.22347  |
| C10                                                                                                                                                                                                                                 | 0.62301  | 0.05896  | 1.32847  | C51  | 0.78004  | 0.41472  | 0.08658  |
| C11                                                                                                                                                                                                                                 | 0.62007  | 0.10081  | 1.48389  | C52  | 0.79757  | 0.37377  | 0.1317   |
| C12                                                                                                                                                                                                                                 | 0.62354  | 0.14911  | 1.36293  | C53  | 0.76657  | 0.32854  | 0.31403  |
| C13                                                                                                                                                                                                                                 | 0.63616  | 0.43265  | 0.71396  | C54  | 0.72002  | 0.32609  | 0.44529  |
| C14                                                                                                                                                                                                                                 | 0.67848  | 0.46096  | 0.90583  | C55  | 0.84805  | 0.37826  | -0.00968 |
| C15                                                                                                                                                                                                                                 | 0.68052  | 0.50794  | 1.03721  | C56  | 0.88607  | 0.36544  | 0.12443  |
| C16                                                                                                                                                                                                                                 | 0.64085  | 0.5261   | 0.97361  | C57  | 0.93255  | 0.36785  | -0.01033 |
| C17                                                                                                                                                                                                                                 | 0.59828  | 0.4962   | 0.77849  | C58  | 0.94227  | 0.3838   | -0.28023 |
| C18                                                                                                                                                                                                                                 | 0.59693  | 0.44951  | 0.65378  | C59  | 0.90516  | 0.39764  | -0.41392 |
| C19                                                                                                                                                                                                                                 | 0.64348  | 0.57573  | 1.1124   | C60  | 0.85827  | 0.39465  | -0.28031 |
| C20                                                                                                                                                                                                                                 | 0.63949  | 0.61798  | 0.9663   | N61  | 0.64669  | 0.94718  | 2.18641  |
| C21                                                                                                                                                                                                                                 | 0.64085  | 0.66431  | 1.09706  | C62  | 0.59624  | 0.90181  | 2.1028   |
| C22                                                                                                                                                                                                                                 | 0.6457   | 0.66911  | 1.37717  | C63  | 0.5954   | 0.85595  | 1.97008  |
| C23                                                                                                                                                                                                                                 | 0.64992  | 0.6268   | 1.52296  | C64  | 0.64687  | 0.85673  | 1.91746  |
| C24                                                                                                                                                                                                                                 | 0.64918  | 0.58078  | 1.39167  | C65  | 0.6983   | 0.90427  | 2.00165  |
| N25                                                                                                                                                                                                                                 | 0.64617  | 0.71653  | 1.51265  | C66  | 0.69731  | 0.94896  | 2.13757  |
| C26                                                                                                                                                                                                                                 | 0.68482  | 0.74456  | 1.71245  | N67  | 0.04856  | 0.3375   | -1.06464 |
| C27                                                                                                                                                                                                                                 | 0.68563  | 0.79029  | 1.84701  | C68  | 0.09035  | 0.38786  | -0.95994 |
| C28                                                                                                                                                                                                                                 | 0.64682  | 0.80823  | 1.77626  | C69  | 0.13738  | 0.39054  | -0.82936 |
| C29                                                                                                                                                                                                                                 | 0.60769  | 0.77913  | 1.56995  | C70  | 0.14138  | 0.34088  | -0.79828 |
| C30                                                                                                                                                                                                                                 | 0.6079   | 0.73335  | 1.44122  | C71  | 0.0972   | 0.28943  | -0.9047  |
| C31                                                                                                                                                                                                                                 | 0.57546  | 0.37009  | 0.40734  | C72  | 0.05151  | 0.28874  | -1.03914 |
| C32                                                                                                                                                                                                                                 | 0.54686  | 0.32541  | 0.22657  | N73  | 0.62455  | 0.38319  | 0.56424  |
| C33                                                                                                                                                                                                                                 | 0.49871  | 0.32081  | 0.09451  | N74  | 0.65592  | 0.35483  | 0.56632  |
| C34                                                                                                                                                                                                                                 | 0.47961  | 0.36027  | 0.14678  | H75  | 0.57195  | 0.29149  | 0.95759  |
| C35                                                                                                                                                                                                                                 | 0.50989  | 0.4052   | 0.33121  | H76  | 0.56429  | 0.20536  | 1.17589  |
| C36                                                                                                                                                                                                                                 | 0.55763  | 0.40901  | 0.45666  | H77  | 0.70866  | 0.22503  | 0.70838  |
| C37                                                                                                                                                                                                                                 | 0.42845  | 0.35476  | 0.00921  | H78  | 0.63866  | 0.11968  | 0.71476  |
| C38                                                                                                                                                                                                                                 | 0.38788  | 0.36228  | 0.15172  | H79  | 0.63184  | 0.03477  | 0.9264   |
| C39                                                                                                                                                                                                                                 | 0.34051  | 0.35884  | 0.02133  | H80  | 0.61605  | 0.09654  | 1.69934  |
| C40                                                                                                                                                                                                                                 | 0.33284  | 0.34835  | -0.25543 | H81  | 0.62207  | 0.18124  | 1.48679  |
| C41                                                                                                                                                                                                                                 | 0.37327  | 0.3402   | -0.39714 | H82  | 0.70861  | 0.44698  | 0.95438  |



|      |         |         |          |       |         |         |          |
|------|---------|---------|----------|-------|---------|---------|----------|
| H83  | 0.71318 | 0.53044 | 1.18693  | H103  | 0.2906  | 0.41789 | -0.18062 |
| H84  | 0.56668 | 0.50826 | 0.72959  | H104  | 0.71983 | 0.44271 | 0.19128  |
| H85  | 0.63584 | 0.61536 | 0.75039  | H105  | 0.80336 | 0.44985 | -0.05094 |
| H86  | 0.63848 | 0.6967  | 0.97941  | H106  | 0.77803 | 0.29603 | 0.35076  |
| H87  | 0.65286 | 0.62896 | 1.73907  | H107  | 0.88014 | 0.3539  | 0.33417  |
| H88  | 0.65176 | 0.54838 | 1.50859  | H108  | 0.96129 | 0.35769 | 0.09579  |
| H89  | 0.71572 | 0.732   | 1.76865  | H109  | 0.91207 | 0.40969 | -0.62284 |
| H90  | 0.71606 | 0.81088 | 2.00753  | H110  | 0.82936 | 0.40401 | -0.38995 |
| H91  | 0.5774  | 0.79188 | 1.50632  | H111  | 0.5561  | 0.90046 | 2.14236  |
| H92  | 0.57673 | 0.71112 | 1.28487  | H112  | 0.55466 | 0.81976 | 1.91332  |
| H93  | 0.56114 | 0.29509 | 0.18886  | H113  | 0.73909 | 0.90732 | 1.9608   |
| H94  | 0.47588 | 0.28608 | -0.04556 | H114  | 0.73734 | 0.98538 | 2.20126  |
| H95  | 0.497   | 0.43647 | 0.37334  | H115  | 0.08804 | 0.4266  | -0.98084 |
| H96  | 0.39259 | 0.37037 | 0.36505  | H116  | 0.17065 | 0.43165 | -0.75784 |
| H97  | 0.30958 | 0.36403 | 0.13747  | H117  | 0.09719 | 0.24961 | -0.88274 |
| H98  | 0.36895 | 0.33254 | -0.61056 | H118  | 0.01798 | 0.24867 | -1.12019 |
| H99  | 0.45114 | 0.33739 | -0.38086 | Cl119 | 0.29941 | 0.30452 | -0.26618 |
| H100 | 0.26798 | 0.27434 | -0.63222 | Cl120 | 0.68838 | 0.69531 | 1.51265  |
| H101 | 0.18911 | 0.27203 | -0.8752  | Cl121 | 0.58818 | 0.9416  | 2.18641  |
| H102 | 0.20819 | 0.41383 | -0.39504 | Cl122 | 0.04587 | 0.39203 | -1.06464 |

**Table S2.** Fractional atomic coordinates for the sql-AB stacking unit cell of BTTA-BDNP.

| <p style="text-align: center;"><i>Space group: P 1 (1) - triclinic</i><br/> <i>a=26.9735 Å, b = 27.8868 Å, c = 6.4092 Å</i><br/> <i>α = β = 90°, γ = 103.2005°</i></p> |          |          |          |      |          |          |          |
|------------------------------------------------------------------------------------------------------------------------------------------------------------------------|----------|----------|----------|------|----------|----------|----------|
| Atom                                                                                                                                                                   | <i>x</i> | <i>y</i> | <i>z</i> | Atom | <i>x</i> | <i>y</i> | <i>z</i> |
| C1                                                                                                                                                                     | 1.12727  | -0.22619 | 0.16976  | C20  | 1.04927  | 0.02751  | 0.7228   |
| C2                                                                                                                                                                     | 1.08079  | -0.25174 | 0.25073  | C21  | 1.04843  | 0.07727  | 0.72734  |
| C3                                                                                                                                                                     | 1.07286  | -0.30301 | 0.27283  | C22  | 1.09383  | 0.11311  | 0.70317  |
| C4                                                                                                                                                                     | 1.11122  | -0.32769 | 0.21392  | C23  | 1.14038  | 0.09902  | 0.69759  |
| C5                                                                                                                                                                     | 1.1577   | -0.30078 | 0.12996  | C24  | 1.14125  | 0.04941  | 0.68972  |
| C6                                                                                                                                                                     | 1.16461  | -0.25007 | 0.11142  | N25  | 1.0925   | 0.16266  | 0.65421  |
| C7                                                                                                                                                                     | 1.10444  | -0.38073 | 0.25387  | C26  | 1.07362  | 0.17279  | 0.46521  |
| C8                                                                                                                                                                     | 1.11033  | -0.41276 | 0.09198  | C27  | 1.0756   | 0.22133  | 0.40618  |
| C9                                                                                                                                                                     | 1.1061   | -0.46271 | 0.13275  | C28  | 1.09682  | 0.25927  | 0.54382  |
| C10                                                                                                                                                                    | 1.09718  | -0.48073 | 0.33622  | C29  | 1.11626  | 0.24831  | 0.73563  |
| C11                                                                                                                                                                    | 1.09098  | -0.44885 | 0.49813  | C30  | 1.11382  | 0.19952  | 0.7886   |
| C12                                                                                                                                                                    | 1.09386  | -0.39918 | 0.45656  | C31  | 1.07268  | -0.13971 | 0.0254   |
| C13                                                                                                                                                                    | 1.1116   | -0.10762 | 0.32218  | C32  | 1.05634  | -0.16881 | -0.14936 |
| C14                                                                                                                                                                    | 1.14428  | -0.09516 | 0.49221  | C33  | 1.00955  | -0.16621 | -0.23958 |
| C15                                                                                                                                                                    | 1.1356   | -0.05857 | 0.62899  | C34  | 0.98059  | -0.13432 | -0.15551 |
| C16                                                                                                                                                                    | 1.09497  | -0.03501 | 0.5927   | C35  | 0.99885  | -0.10424 | 0.01696  |
| C17                                                                                                                                                                    | 1.06033  | -0.0515  | 0.4282   | C36  | 1.04478  | -0.10812 | 0.10462  |
| C18                                                                                                                                                                    | 1.06998  | -0.08752 | 0.2959   | C37  | 0.9276   | -0.13902 | -0.21982 |
| C19                                                                                                                                                                    | 1.09531  | 0.01327  | 0.6878   | C38  | 0.91203  | -0.09988 | -0.31699 |
| C39                                                                                                                                                                    | 0.86017  | -0.10228 | -0.34784 | H88  | 1.17728  | 0.03979  | 0.66089  |

|      |         |          |          |      |         |          |          |
|------|---------|----------|----------|------|---------|----------|----------|
| C40  | 0.82339 | -0.14344 | -0.27738 | H89  | 1.05762 | 0.14333  | 0.35758  |
| C41  | 0.83967 | -0.18278 | -0.18344 | H90  | 1.06066 | 0.22907  | 0.25611  |
| C42  | 0.89126 | -0.18072 | -0.15672 | H91  | 1.13306 | 0.27705  | 0.84414  |
| N43  | 0.76973 | -0.14467 | -0.29    | H92  | 1.1291  | 0.19125  | 0.93716  |
| C44  | 0.73621 | -0.18777 | -0.33982 | H93  | 1.0782  | -0.19377 | -0.21    |
| C45  | 0.68402 | -0.19176 | -0.32676 | H94  | 0.99491 | -0.19007 | -0.36949 |
| C46  | 0.66494 | -0.15079 | -0.27082 | H95  | 0.97628 | -0.08122 | 0.08859  |
| C47  | 0.69992 | -0.10621 | -0.22897 | H96  | 0.93981 | -0.06731 | -0.36457 |
| C48  | 0.7521  | -0.104   | -0.23725 | H97  | 0.84869 | -0.07175 | -0.4223  |
| C49  | 1.19571 | -0.16743 | 0.07447  | H98  | 0.81231 | -0.21436 | -0.12297 |
| C50  | 1.22956 | -0.12296 | 0.03079  | H99  | 0.90284 | -0.21064 | -0.07705 |
| C51  | 1.27884 | -0.12438 | -0.03441 | H100 | 0.74965 | -0.2199  | -0.3867  |
| C52  | 1.29346 | -0.16994 | -0.05214 | H101 | 0.65905 | -0.2269  | -0.36303 |
| C53  | 1.25779 | -0.21452 | -0.01058 | H102 | 0.68744 | -0.07362 | -0.18285 |
| C54  | 1.20898 | -0.21197 | 0.05034  | H103 | 0.77818 | -0.06987 | -0.19414 |
| C55  | 1.34673 | -0.17032 | -0.09963 | H104 | 1.21867 | -0.08821 | 0.05107  |
| C56  | 1.37371 | -0.19468 | 0.03548  | H105 | 1.30613 | -0.09009 | -0.06317 |
| C57  | 1.42494 | -0.19281 | 0.00111  | H106 | 1.26806 | -0.24975 | -0.02254 |
| C58  | 1.45092 | -0.16555 | -0.18131 | H107 | 1.35527 | -0.214   | 0.17142  |
| C59  | 1.42243 | -0.14233 | -0.31487 | H108 | 1.44568 | -0.21026 | 0.11108  |
| C60  | 1.37121 | -0.14432 | -0.27316 | H109 | 0.43981 | -0.12256 | -0.45139 |
| N61  | 1.09479 | 0.4686   | 0.37956  | H110 | 1.35018 | -0.12564 | -0.37735 |
| C62  | 1.06173 | 0.41808  | 0.17361  | H111 | 1.04552 | 0.43337  | 0.03593  |
| C63  | 1.06015 | 0.33615  | 0.19867  | H112 | 1.05414 | 0.37043  | 0.143    |
| C64  | 1.09726 | 0.31011  | 0.49368  | H113 | 1.13103 | 0.3584   | 0.88299  |
| C65  | 1.11876 | 0.37103  | 0.73283  | H114 | 1.12087 | -0.58332 | 0.73859  |
| C66  | 1.11826 | 0.45006  | 0.66276  | H115 | 0.52055 | -0.08624 | -0.30206 |
| N67  | 0.50434 | -0.16227 | -0.21619 | H116 | 0.61149 | -0.07883 | -0.34001 |
| C68  | 0.5356  | -0.11851 | -0.27512 | H117 | 0.58992 | -0.232   | -0.16395 |
| C69  | 0.58794 | -0.11403 | -0.2939  | H118 | 1.49953 | -0.23745 | -0.13593 |
| C70  | 0.60905 | -0.15477 | -0.25525 | C119 | 0.64508 | 0.27276  | 1.14594  |
| C71  | 0.57597 | -0.19949 | -0.19905 | C120 | 0.6018  | 0.24016  | 1.22145  |
| C72  | 0.52394 | -0.20248 | -0.18051 | C121 | 0.60325 | 0.19032  | 1.24512  |
| N73  | 1.11632 | -0.13895 | 0.1519   | C122 | 0.64754 | 0.17336  | 1.19305  |
| N74  | 1.14552 | -0.17432 | 0.15499  | C123 | 0.69118 | 0.20772  | 1.1188   |
| H75  | 1.05215 | -0.23254 | 0.29982  | C124 | 0.68879 | 0.25701  | 1.09832  |
| H76  | 1.03728 | -0.32351 | 0.33817  | C125 | 0.64736 | 0.11989  | 1.20924  |
| H77  | 1.18809 | -0.31861 | 0.08908  | C126 | 0.67146 | 0.09687  | 1.05605  |
| H78  | 1.11843 | -0.39896 | -0.06498 | C127 | 0.66958 | 0.04632  | 1.06674  |
| H79  | 1.11114 | -0.48702 | 0.00717  | C128 | 0.64326 | 0.01768  | 1.22938  |
| H80  | 1.08336 | 0.53751  | 0.65563  | C129 | 0.61955 | 0.04037  | 1.38313  |
| H81  | 1.08927 | -0.37479 | 0.58289  | C130 | 0.62184 | 0.09101  | 1.37379  |
| H82  | 1.17665 | -0.11151 | 0.5134   | C131 | 0.61589 | 0.39933  | 1.14547  |
| H83  | 1.16215 | -0.04654 | 0.75568  | C132 | 0.6434  | 0.42385  | 1.31373  |
| H84  | 1.0297  | -0.03371 | 0.39166  | C133 | 0.64202 | 0.47346  | 1.34985  |
| H85  | 1.01351 | 0.00029  | 0.72628  | C134 | 0.61368 | 0.49824  | 1.21675  |
| H86  | 1.01233 | 0.08799  | 0.73473  | C135 | 0.58556 | 0.47179  | 1.05031  |
| H87  | 1.17554 | 0.12665  | 0.67846  | C136 | 0.58728 | 0.42281  | 1.0209   |
| C137 | 0.6147  | 0.55166  | 1.24432  | C186 | 0.03927 | 0.41548  | 0.53678  |

|      |          |         |         |      |          |          |          |
|------|----------|---------|---------|------|----------|----------|----------|
| C138 | 0.57215  | 0.57046 | 1.19079 | C187 | 0.12844  | 0.40726  | 0.38058  |
| C139 | 0.57468  | 0.62109 | 1.19544 | C188 | 0.15016  | 0.37453  | 0.27153  |
| C140 | 0.61959  | 0.65448 | 1.25738 | C189 | 0.11075  | 0.39009  | 0.40369  |
| C141 | 0.66151  | 0.63572 | 1.31916 | C190 | 0.04241  | 0.36988  | 0.52938  |
| C142 | 0.65917  | 0.58499 | 1.31176 | N191 | 0.6121   | 0.34939  | 1.0798   |
| N143 | 0.62286  | 0.70705 | 1.2533  | N192 | 0.65139  | 0.32423  | 1.10473  |
| C144 | 0.6657   | 0.73844 | 1.17758 | H193 | 0.56771  | 0.25263  | 1.25833  |
| C145 | 0.66977  | 0.7893  | 1.17357 | H194 | 0.56914  | 0.1647   | 1.29847  |
| C146 | 0.62905  | 0.80912 | 1.24188 | H195 | 0.72575  | 0.1965   | 1.07769  |
| C147 | 0.58495  | 0.77599 | 1.31385 | H196 | 0.69071  | 0.11765  | 0.92514  |
| C148 | 0.58291  | 0.72551 | 1.32158 | H197 | 0.68772  | 0.02921  | 0.94607  |
| C149 | 0.57883  | 0.34454 | 0.9021  | H198 | 0.59948  | 1.01882  | 1.51084  |
| C150 | 0.55811  | 0.30196 | 0.78823 | H199 | 0.60365  | 0.10763  | 1.4964   |
| C151 | 0.51853  | 0.30316 | 0.6457  | H200 | 0.66521  | 0.40524  | 1.41461  |
| C152 | 0.50051  | 0.34673 | 0.61737 | H201 | 0.66279  | 0.49227  | 1.48175  |
| C153 | 0.52429  | 0.38986 | 0.72533 | H202 | 0.56424  | 0.48902  | 0.94219  |
| C154 | 0.56281  | 0.38741 | 0.86624 | H203 | 0.53674  | 0.54601  | 1.14272  |
| C155 | 0.45196  | 0.34587 | 0.50735 | H204 | 0.54177  | 0.63424  | 1.14573  |
| C156 | 0.44709  | 0.38497 | 0.37591 | H205 | 0.69632  | 0.66035  | 1.37118  |
| C157 | 0.39885  | 0.3901  | 0.3121  | H206 | 0.69291  | 0.5723   | 1.35302  |
| C158 | 0.35491  | 0.35646 | 0.38038 | H207 | 0.6972   | 0.72443  | 1.11765  |
| C159 | 0.35984  | 0.31592 | 0.5013  | H208 | 0.70443  | 0.81269  | 1.1141   |
| C160 | 0.40796  | 0.31046 | 0.56322 | H209 | 0.5526   | 0.78897  | 1.37087  |
| N161 | 0.3054   | 0.36587 | 0.34541 | H210 | 0.54915  | 0.70138  | 1.38567  |
| C162 | 0.28106  | 0.35366 | 0.1597  | H211 | 0.5701   | 0.26802  | 0.81543  |
| C163 | 0.23104  | 0.35873 | 0.13219 | H212 | 0.50029  | 0.26964  | 0.56481  |
| C164 | 0.20586  | 0.37718 | 0.29445 | H213 | 0.51018  | 0.42313  | 0.71413  |
| C165 | 0.23245  | 0.39115 | 0.48166 | H214 | 0.48049  | 0.41273  | 0.33098  |
| C166 | 0.28214  | 0.38499 | 0.5043  | H215 | 0.39562  | 0.4216   | 0.21868  |
| C167 | 0.70154  | 0.33865 | 1.01837 | H216 | 0.32615  | 0.2898   | 0.55518  |
| C168 | 0.72489  | 0.38421 | 0.93324 | H217 | 0.41046  | 0.28042  | 0.66674  |
| C169 | 0.77414  | 0.39023 | 0.85096 | H218 | 0.29959  | 0.33836  | 0.03417  |
| C170 | 0.79954  | 0.35105 | 0.85356 | H219 | 0.21169  | 0.34678  | -0.01325 |
| C171 | 0.77477  | 0.30494 | 0.93806 | H220 | 0.21486  | 0.40515  | 0.6123   |
| C172 | 0.72558  | 0.29982 | 1.01742 | H221 | 0.30154  | 0.39446  | 0.65168  |
| C173 | 0.85099  | 0.35833 | 0.76028 | H222 | 0.70573  | 0.41427  | 0.92862  |
| C174 | 0.89197  | 0.34961 | 0.87813 | H223 | 0.79265  | 0.42562  | 0.78522  |
| C175 | 0.94113  | 0.35968 | 0.79424 | H224 | 0.79288  | 0.27405  | 0.93684  |
| C176 | 0.94919  | 0.37679 | 0.57426 | H225 | 0.88609  | 0.33669  | 1.03761  |
| C177 | 0.90742  | 0.3851  | 0.46371 | H226 | 0.9725   | 0.35539  | 0.89238  |
| C178 | 0.85919  | 0.37636 | 0.55519 | H227 | -0.08768 | 0.39893  | 0.30582  |
| N179 | 0.63969  | 0.96541 | 1.23532 | H228 | 0.82775  | 0.38378  | 0.46517  |
| C180 | 0.59338  | 0.93357 | 1.21229 | H229 | 0.55932  | 0.94739  | 1.19032  |
| C181 | 0.5891   | 0.88266 | 1.21455 | H230 | 0.55185  | 0.85869  | 1.19338  |
| C182 | 0.63271  | 0.8636  | 1.23996 | H231 | 0.71458  | 0.88484  | 1.29012  |
| C183 | 0.67989  | 0.89725 | 1.26523 | H232 | 0.7193   | -0.02682 | 1.28248  |
| C184 | 0.68257  | 0.94794 | 1.26233 | H233 | 0.03102  | 0.44887  | 0.6176   |
| N185 | -0.00225 | 0.38461 | 0.46962 | H234 | 0.16916  | 0.44747  | 0.36529  |
| H235 | 0.06801  | 0.36349 | 0.48027 | H236 | 1.02313  | 0.33474  | 0.65793  |

**Table S3.** Comparison of  $\text{ReO}_4^-$  detection limit of BTTA-BDNP with other materials

| Methods      | Probes       | LOD                | Ref.      |
|--------------|--------------|--------------------|-----------|
| Fluorescence | Auramine O   | 270 $\mu\text{M}$  | 1         |
|              | Thioflavin-T | 260 $\mu\text{M}$  | 2         |
|              | TJNU-302     | 90 $\mu\text{M}$   | 3         |
|              | PMA          | 14 $\mu\text{M}$   | 4         |
|              | Ir-PAF       | 2.99 $\mu\text{M}$ | 5         |
|              | MOR-1        | 0.36 ppm           | 6         |
|              | MOR-2        | 0.15 ppm           | 7         |
|              | BTTA-BDNP    | 66.7 nM            | This work |

**Table S4.** Comparison of the reported adsorption for  $\text{TcO}_4^-/\text{ReO}_4^-$ .

| Adsorbent                     | Target Anion     | Capacity (mg/g) | Equilibrium time | Reference |
|-------------------------------|------------------|-----------------|------------------|-----------|
| TJNU-302                      | $\text{ReO}_4^-$ | 211             | 5 min            | 3         |
| SLUG-21                       | $\text{ReO}_4^-$ | 602             | >24 h            | 8         |
| $\text{ZrO}_2@\text{rGO}$     | $\text{ReO}_4^-$ | 43.55           | 5 h              | 9         |
| 4-ATR resin                   | $\text{ReO}_4^-$ | 354             | 8 h              | 10        |
| PAF-1-F                       | $\text{ReO}_4^-$ | 420             | 250 min          | 11        |
| SCU-100                       | $\text{ReO}_4^-$ | 541             | 30 min           | 12        |
| SCU-101                       | $\text{ReO}_4^-$ | 217             | 10 min           | 13        |
| SCU-102                       | $\text{ReO}_4^-$ | 291             | 20 min           | 14        |
| SCU-103                       | $\text{ReO}_4^-$ | 318             | 5 min            | 15        |
| DhaTG <sub>Cl</sub>           | $\text{ReO}_4^-$ | 437             | 30 min           | 16        |
| 3DCOF-g-VBPPH <sub>3</sub> Cl | $\text{ReO}_4^-$ | 181             | <1 min           | 17        |
| BTTA-BDNP                     | $\text{ReO}_4^-$ | 648             | 2 min            | This work |

**Table S5.** Fitting results are based on the Langmuir and Freundlich models.

| Isotherm model | Parameters                                                   |
|----------------|--------------------------------------------------------------|
| Langmuir       | $q_m = 726 \text{ mg g}^{-1}$                                |
|                | $K_L = 0.014 \text{ L mg}^{-1}$                              |
|                | $R^2 = 0.999$                                                |
| Freundlich     | $K_F = 182.91 \text{ (mg g}^{-1}) \text{ (L g}^{-1})^{4.56}$ |
|                | $n = 4.56$                                                   |
|                | $R^2 = 0.961$                                                |

**Table S6.** Composition of simulated Hanford LAW melter recycle stream.

| Anion              | Concentration, mol/L  | Anion: $\text{TcO}_4^-$ molar ratio |
|--------------------|-----------------------|-------------------------------------|
| $\text{TcO}_4^-$   | $1.94 \times 10^{-4}$ | 1.0                                 |
| $\text{NO}_3^-$    | $6.07 \times 10^{-2}$ | 314                                 |
| $\text{Cl}^-$      | $6.39 \times 10^{-2}$ | 330                                 |
| $\text{NO}_2^-$    | $1.69 \times 10^{-1}$ | 873                                 |
| $\text{SO}_4^{2-}$ | $6.64 \times 10^{-6}$ | 0.0343                              |
| $\text{CO}_3^{2-}$ | $4.30 \times 10^{-5}$ | 0.222                               |

**Table S7.** Results of  $\text{ReO}_4^-$  sorption by TFPM-EP-Br from simulated Hanford waste.

| Simulated wastes | Anions           | Solid-to-liquid ratio (g/L) | Anion removal percentage (%) |
|------------------|------------------|-----------------------------|------------------------------|
| Hanford waste    | $\text{ReO}_4^-$ | 1:1                         | 59.4%                        |
|                  | $\text{ReO}_4^-$ | 5:1                         | 81.9%                        |

## REFERENCES

- 1 A. M. Desai, P. K. Singh, *Sens. Actuators B Chem.*, 2018, **277**, 205-209.
- 2 A. M. Desai, P. K. Singh, *Chem. Eur. J.*, 2019, **25**, 2035-2042.
- 3 C.-P. Li, H. Zhou, J. Chen, J.-J. Wang, M. Du, W. Zhou, *ACS Appl. Mater. Interfaces*, 2020, **12**, 15246-15254.
- 4 G. Singh, S. P. Pandey, P. K. Singh, *Sens. Actuators B Chem.*, 2021, **330**, 129346.
- 5 D. Xu, L. Chen, X. Dai, B. Li, Y. Wang, W. Liu, J. Li, Y. Tao, Y. Wang, Y. Liu, G. Peng, R. Zhou, Z. Chai, S. Wang, *ACS Appl. Mater. Interfaces*, 2020, **12**, 15288-15297.
- 6 S. Rapti, S. A. Diamantis, A. Dafnomili, A. Pournara, E. Skliri, G. S. Armatas, A. C. Tsipis, I. Spanopoulos, C. D. Malliakas, M. G. Kanatzidis, J. C. Plakatouras, F. Noli, T. Lazarides, M. J. Manos, *J. Mater. Chem. A.*, 2018, **6**, 20813-20821.
- 7 V. Amendola, G. Bergamaschi, M. Boiocchi, R. Alberto, H. Braband, *Chem. Sci.*, 2014, **5**, 1820-1826.
- 8 H. Fei, M. R. Bresler, S. R. J. Oliver, *J. Am. Chem. Soc.*, 2011, **133**, 11110-11113.
- 9 Y. Gao, K. Chen, X. Tan, X. Wang, A. Alsaedi, T. Hayat, C. Chen, *ACS Sustain. Chem. Eng.*, 2017, **5**, 2163-2171.
- 10 C. Xiong, C. Yao, X. Wu, *Hydrometallurgy*, 2008, **90**, 221-226.
- 11 D. Banerjee, S. K. Elsaidi, B. Aguila, B. Li, D. Kim, M. J. Schweiger, A. A. Kruger, C. J. Doonan, S. Ma, P. K. Thallapally, *Chem. Eur. J.*, 2016, **22**, 17581-17584.
- 12 D. Sheng, L. Zhu, C. Xu, C. Xiao, Y. Wang, Y. Wang, L. Chen, J. Diwu, J. Chen, Z. Chai, T. E. Albrecht-Schmitt, S. Wang, *Environ. Sci. Technol.*, 2017, **51**, 3471-3479.
- 13 L. Zhu, D. Sheng, C. Xu, X. Dai, M. A. Silver, J. Li, P. Li, Y. Wang, Y. Wang, L. Chen, C. Xiao, J. Chen, R. Zhou, C. Zhang, O. K. Farha, Z. Chai, T. E. Albrecht-Schmitt, S. Wang, *J. Am. Chem. Soc.*, 2017, **139**, 14873-14876.
- 14 D. Sheng, L. Zhu, X. Dai, C. Xu, P. Li, C. I. Pearce, C. Xiao, J. Chen, R. Zhou, T. Duan, O. K. Farha, Z. Chai, S. Wang, *Angew. Chem. Int. Ed.*, 2019, **58**, 4968-4972.
- 15 N. Shen, Z. Yang, S. Liu, X. Dai, C. Xiao, K. Taylor-Pashow, D. Li, C. Yang, J. Li, Y. Zhang, M. Zhang, R. Zhou, Z. Chai, S. Wang, *Nat. Commun.*, 2020, **11**, 5571.
- 16 H.-J. Da, C.-X. Yang, X.-P. Yan, *Environ. Sci. Technol.*, 2019, **53**, 5212-5220.
- 17 Y. Wang, J. Lan, X. Yang, S. Zhong, L. Yuan, J. Li, J. Peng, Z. Chai, J. K. Gibson, M. Zhai, W. Shi, *Adv. Funct. Mater.*, 2022, **32**, 2205222.
